# Supplementary material
Source: publisher figshare collection journal article supplement (https://acs.figshare.com/ndownloader/files/24163770)
Supplement: Supplementary file 1 [file 24163770]

# Supporting Information

## Lyophilization Reveals a Multitude of Structural Conformations in the Chromophore of a Cph2-like Phytochrome

**Yunmi Kim,<sup>†</sup> Qian-Zhao Xu,<sup>†,‡</sup> Kai-Hong Zhao,<sup>‡</sup> Wolfgang Gärtner,<sup>†</sup> Jörg Matysik,<sup>†</sup>  
and Chen Song<sup>\*,†</sup>**

<sup>†</sup>Institut für Analytische Chemie, Universität Leipzig, Linnéstraße 3, 04103 Leipzig, Germany.

<sup>‡</sup>State Key Laboratory of Agricultural Microbiology, Huazhong Agricultural University, Wuhan 430070, China.

\*Correspondence: chen.song@uni-leipzig.de (C.S.).

### **This pdf file includes:**

Figures S1–S4

Tables S1–S4

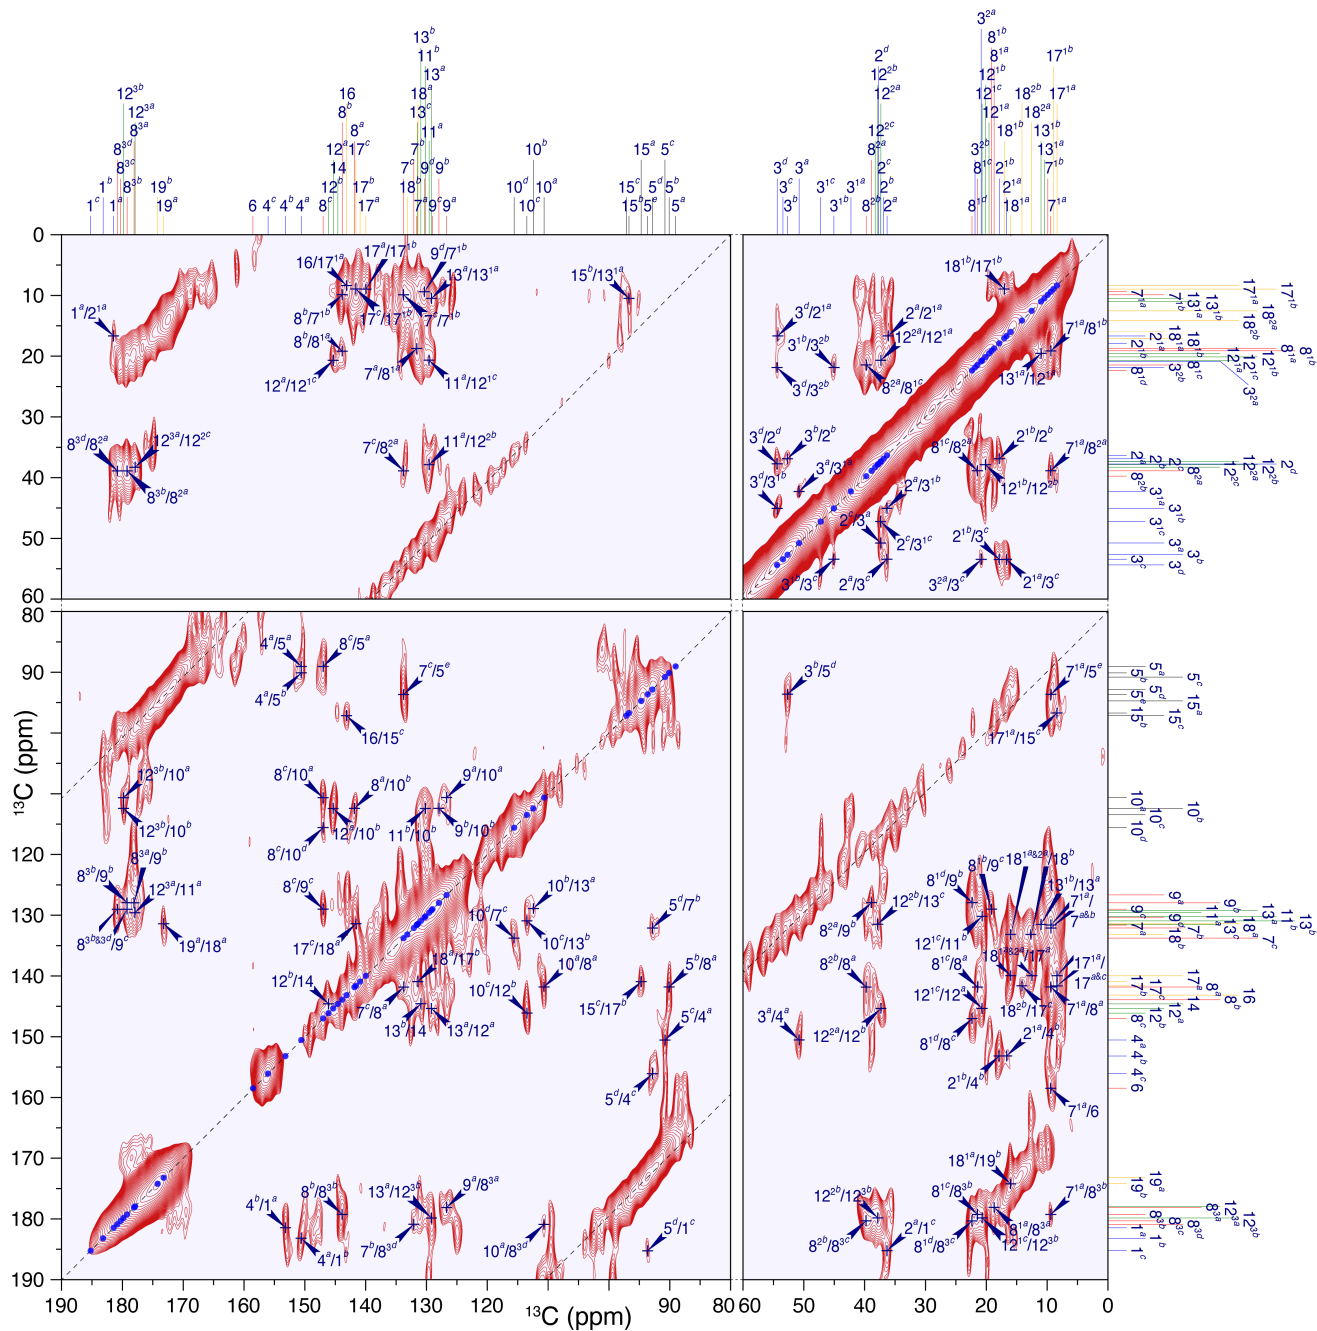

**Figure S1.** Enlarged contour plot of the DARR spectrum shown in Figure 2a. The DARR spectrum of lyophilized  $u$ -[ $^{13}\text{C}$ ,  $^{15}\text{N}$ ]-PCB-All2699GAF1 as Pr was acquired with a mixing time of 50 ms. The 1D traces of the 2D spectrum (along  $\omega_1$ -, right, and  $\omega_2$ -dimension, top) are shown as stick spectra with the assignment of  $^{13}\text{C}$  peaks (see Figure 1d for chromophore numbering).





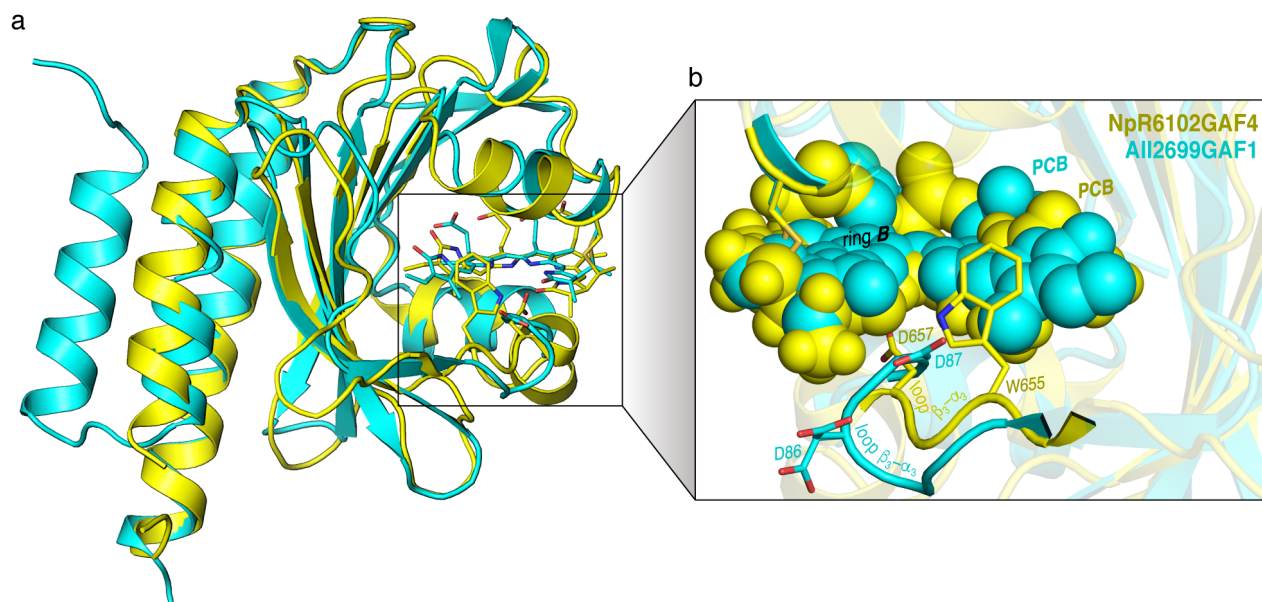

**Figure S4.** Structural comparison of All2699GAF1 and NpR6102GAF4 in the red-absorbing Pr state. (a) Superposition of All2699GAF1 6OZA (cyan) and NpR6102GAF4 6BHN (yellow) structures. The respective PCB chromophores are shown as sticks using the same color coding as for the ribbon diagrams. (b) Structural views of the PCB-chromophore binding pocket in the two GAF-only domains, highlighting the chromophore and the loop  $\beta_3-\alpha_3$  on the bilin  $\beta$  face. Local structural flexibility of this loop is given by the alternative side-chains of D86 in All2699GAF1 and W655 and D657 in NpR6102GAF4.

**Table S1.**  $^{13}\text{C}$  chemical shifts of the PCB chromophore incorporated in All2699GAF1 and All2699(GAF1-PHY) in their Pr dark states as lyophilized powder. Published  $^{13}\text{C}$  data of frozen All2699GAF1 and All2699(GAF1-PHY) solutions are listed for reference. The  $^{13}\text{C}$  chemical shift values obtained from All2699GAF1 and All2699(GAF1-PHY) as lyophilized powder are compared with those from the frozen solution samples. The  $^{13}\text{C}$  chemical shift differences of PCB chromophore in the two photoreceptors between the lyophilized and frozen solution states are listed and illustrated in Figure 2. The chromophore numbering is according to Figure 1d.

| PCB carbons |                | $^{13}\text{C}$ chemical shift (ppm) |                    |                    |                    | $^{13}\text{C}$ chemical shift difference (ppm)              |          |                                                          |                   |
|-------------|----------------|--------------------------------------|--------------------|--------------------|--------------------|--------------------------------------------------------------|----------|----------------------------------------------------------|-------------------|
|             |                | All2699GAF1                          |                    | All2699(GAF1-PHY)  |                    | $\Delta_{\text{Lyophilized state} - \text{Frozen solution}}$ |          | $\Delta_{\text{All2699(GAF1-PHY)} - \text{All2699GAF1}}$ |                   |
|             |                | Frozen solution                      | Lyophilized state  | Frozen solution    | Lyophilized state  | GAF1                                                         | GAF1-PHY | Frozen solution                                          | Lyophilized state |
| ring A      | 1              | 181.6 ( $1^a$ )                      | 182.0 ( $1^a$ )    | 180.8 ( $1^a$ )    | 181.6 ( $1^a$ )    | +0.4                                                         | +0.8     | -0.8                                                     | -0.4              |
|             |                | 182.7 ( $1^b$ )                      | 183.8 ( $1^b$ )    | 181.8 ( $1^b$ )    | 183.6 ( $1^b$ )    | +1.1                                                         | +1.8     | -0.9                                                     | -0.2              |
|             |                | -                                    | 185.8 ( $1^c$ )    | -                  | -                  | -                                                            | -        | -                                                        | -                 |
|             | 2              | 33.4 ( $2^a$ )                       | 36.7 ( $2^a$ )     | -                  | -                  | +3.3                                                         | -        | -                                                        | -                 |
|             |                | 35.9 ( $2^b$ )                       | 37.2 ( $2^b$ )     | 36.5 ( $2^a$ )     | 37.1 ( $2^a$ )     | +1.3                                                         | +0.6     | +0.6                                                     | -0.1              |
|             |                | 36.9 ( $2^c$ )                       | 37.8 ( $2^c$ )     | -                  | -                  | +0.9                                                         | -        | -                                                        | -                 |
|             |                | -                                    | 38.1 ( $2^d$ )     | 37.1 ( $2^b$ )     | 38.8 ( $2^b$ )     | -                                                            | +1.7     | +0.2                                                     | +0.7              |
|             | 2 <sup>1</sup> | 17.1 ( $2^{1a}$ )                    | 17.0 ( $2^{1a}$ )  | -                  | -                  | -0.1                                                         | -        | +0.9                                                     | 0.0               |
|             |                | 17.3 ( $2^{1b}$ )                    | 18.2 ( $2^{1b}$ )  | 18.0               | 17.0               | +0.9                                                         | -1.0     | +0.7                                                     | -1.2              |
|             | 3              | 51.7 ( $3^a$ )                       | 51.2 ( $3^a$ )     | 53.1 ( $3^a$ )     | 51.8 ( $3^a$ )     | -0.5                                                         | -1.3     | +1.4                                                     | +0.6              |
|             |                | 53.7 ( $3^b$ )                       | 53.1 ( $3^b$ )     | 53.6 ( $3^b$ )     | 53.5 ( $3^b$ )     | -0.6                                                         | -0.1     | -0.1                                                     | +0.4              |
|             |                | 54.5 ( $3^c$ )                       | 53.8 ( $3^c$ )     | -                  | 54.1 ( $3^c$ )     | -0.7                                                         | -        | -                                                        | +0.3              |
|             |                | -                                    | 54.8 ( $3^d$ )     | -                  | -                  | -                                                            | -        | -                                                        | -                 |
|             | 3 <sup>1</sup> | 42.9 ( $3^{1a}$ )                    | 42.6 ( $3^{1a}$ )  | 46.5 ( $3^{1a}$ )  | 43.9 ( $3^{1a}$ )  | -0.3                                                         | -2.6     | -                                                        | +1.3              |
|             |                | 46.7 ( $3^{1b}$ )                    | 45.4 ( $3^{1b}$ )  | -                  | -                  | -1.3                                                         | -        | -0.2                                                     | -                 |
|             |                | 47.3 ( $3^{1c}$ )                    | 47.8 ( $3^{1c}$ )  | 47.4 ( $3^{1b}$ )  | 46.7 ( $3^{1b}$ )  | +0.5                                                         | -0.7     | +0.1                                                     | -1.1              |
|             | 3 <sup>2</sup> | 20.4 ( $3^{2a}$ )                    | 21.2 ( $3^{2a}$ )  | 20.6 ( $3^{2a}$ )  | 22.5               | +0.8                                                         | +1.9     | +0.2                                                     | +1.3              |
|             |                | 21.3 ( $3^{2b}$ )                    | 22.2 ( $3^{2b}$ )  | 21.6 ( $3^{2b}$ )  | -                  | +0.9                                                         | +0.9     | +0.3                                                     | +0.3              |
|             | 4              | 154.3 ( $4^a$ )                      | 151.1 ( $4^a$ )    | 154.5 ( $4^a$ )    | -                  | -2.3                                                         | +1.1     | +0.2                                                     | +4.5              |
|             |                | 155.7 ( $4^b$ )                      | 153.8 ( $4^b$ )    | 155.1 ( $4^b$ )    | 155.6              | -1.9                                                         | +0.5     | -0.6                                                     | +1.8              |
|             |                | 158.2 ( $4^c$ )                      | 156.6 ( $4^c$ )    | -                  | -                  | -1.6                                                         | -        | -                                                        | -1.0              |
| A-B         | 5              | 87.3 ( $5^a$ )                       | 89.5 ( $5^a$ )     | -                  | 87.3 ( $5^a$ )     | +2.2                                                         | -0.4     | +0.4                                                     | -2.2              |
|             |                | 88.5 ( $5^b$ )                       | 90.6 ( $5^b$ )     | 87.7               | 88.1 ( $5^b$ )     | +2.1                                                         | +0.4     | -0.8                                                     | -2.5              |
|             |                | -                                    | 91.2 ( $5^c$ )     | -                  | 89.5 ( $5^c$ )     | -                                                            | +1.8     | -                                                        | -1.7              |
|             |                | -                                    | 93.3 ( $5^d$ )     | -                  | -                  | -                                                            | -        | -                                                        | -                 |
|             |                | -                                    | 94.1 ( $5^e$ )     | -                  | -                  | -                                                            | -        | -                                                        | -                 |
| ring B      | 6              | 150.2                                | 159.1              | 149.5              | 150.6 ( $6^a$ )    | +8.9                                                         | +1.1     | -0.7                                                     | -8.5              |
|             |                | -                                    | -                  | -                  | 152.0 ( $6^b$ )    | -                                                            | +2.5     | -                                                        | -7.1              |
|             | 7              | -                                    | 132.1 ( $7^a$ )    | -                  | -                  | +5.6                                                         | -        | -                                                        | -1.4              |
|             |                | 126.5                                | 132.6 ( $7^b$ )    | 127.6              | 130.7              | +6.1                                                         | +3.1     | +1.1                                                     | -1.9              |
|             |                | -                                    | 134.2 ( $7^c$ )    | -                  | -                  | +7.7                                                         | -        | -                                                        | -3.5              |
|             | 7 <sup>1</sup> | 8.8                                  | 9.7 ( $7^{1a}$ )   | 9.2                | 9.2 ( $7^{1a}$ )   | +0.9                                                         | 0.0      | +0.4                                                     | -0.5              |
|             |                | -                                    | 10.2 ( $7^{1b}$ )  | -                  | 10.0 ( $7^{1b}$ )  | +1.4                                                         | +0.8     | -                                                        | -0.2              |
|             | 8              | -                                    | 142.2 ( $8^{1a}$ ) | -                  | -                  | -4.5                                                         | -        | -                                                        | -                 |
|             |                | 146.7                                | 144.4 ( $8^{1b}$ ) | 146.0              | 145.6 ( $8^{1a}$ ) | -2.3                                                         | -0.4     | -0.7                                                     | +1.2              |
|             |                | -                                    | 147.5 ( $8^{1c}$ ) | -                  | 146.4 ( $8^{1b}$ ) | -1.2                                                         | +0.4     | -                                                        | -1.1              |
|             | 8 <sup>1</sup> | -                                    | 19.0 ( $8^{1a}$ )  | -                  | -                  | -                                                            | -        | -                                                        | -                 |
|             |                | 19.3 ( $8^{1a}$ )                    | 19.5 ( $8^{1b}$ )  | 20.8 ( $8^{1a}$ )  | 20.2 ( $8^{1a}$ )  | +0.2                                                         | -0.6     | +1.5                                                     | +0.7              |
|             |                | 21.7 ( $8^{1b}$ )                    | 21.8 ( $8^{1c}$ )  | 22.0 ( $8^{1b}$ )  | 21.6 ( $8^{1b}$ )  | +0.1                                                         | -0.4     | +0.3                                                     | -0.2              |
|             |                | -                                    | 22.7 ( $8^{1d}$ )  | -                  | -                  | -                                                            | -        | -                                                        | -                 |
|             | 8 <sup>2</sup> | 39.9 ( $8^{2a}$ )                    | 39.2 ( $8^{2a}$ )  | 39.1 ( $8^{2a}$ )  | 39.2 ( $8^{2a}$ )  | -0.7                                                         | +0.1     | -0.8                                                     | 0.0               |
|             |                | 40.7 ( $8^{2b}$ )                    | 40.1 ( $8^{2b}$ )  | 40.1 ( $8^{2b}$ )  | 40.8 ( $8^{2b}$ )  | -0.6                                                         | +0.7     | -0.6                                                     | +0.7              |
|             | 8 <sup>3</sup> | 178.1 ( $8^{3a}$ )                   | 178.6 ( $8^{3a}$ ) | 179.4 ( $8^{3a}$ ) | 178.3 ( $8^{3a}$ ) | +0.5                                                         | -1.1     | -                                                        | -0.3              |
|             |                | 179.2 ( $8^{3b}$ )                   | 179.8 ( $8^{3b}$ ) | 179.9 ( $8^{3b}$ ) | 180.3 ( $8^{3b}$ ) | +0.6                                                         | +0.4     | +0.2                                                     | +0.5              |
|             |                | 180.4 ( $8^{3c}$ )                   | 180.8 ( $8^{3c}$ ) | -                  | -                  | +0.4                                                         | -        | -0.5                                                     | -                 |
|             |                | -                                    | 181.4 ( $8^{3d}$ ) | -                  | -                  | -                                                            | -        | -                                                        | -                 |
|             | 9              | -                                    | 127.2 ( $9^a$ )    | -                  | -                  | -0.9                                                         | -        | -                                                        | -                 |
|             |                | 128.1                                | 128.4 ( $9^b$ )    | 128.0              | 128.3 ( $9^a$ )    | +0.3                                                         | +0.3     | -0.1                                                     | -0.1              |
|             |                | -                                    | 129.5 ( $9^c$ )    | -                  | 129.1 ( $9^b$ )    | +1.4                                                         | +1.1     | -                                                        | -0.4              |
|             |                | -                                    | 130.8 ( $9^d$ )    | -                  | -                  | +2.7                                                         | -        | -                                                        | -                 |

Continued on following page.



|               |                       | <sup>13</sup> C chemical shift (ppm) |                           |                   |                           | <sup>13</sup> C chemical shift difference (ppm)  |          |                                              |                   |
|---------------|-----------------------|--------------------------------------|---------------------------|-------------------|---------------------------|--------------------------------------------------|----------|----------------------------------------------|-------------------|
| PCB carbons   |                       | All2699GAF1                          |                           | All2699(GAF1-PHY) |                           | Δ <sub>Lyophilized state – Frozen solution</sub> |          | Δ <sub>All2699(GAF1-PHY) – All2699GAF1</sub> |                   |
|               |                       | Frozen solution                      | Lyophilized state         | Frozen solution   | Lyophilized state         | GAF1                                             | GAF1-PHY | Frozen solution                              | Lyophilized state |
| <b>B–C</b>    | <b>10</b>             | 111.6                                | 111.2 (10 <sup>a</sup> )  | -                 | -                         | -0.4                                             | -        | -                                            | -                 |
|               |                       |                                      | 112.9 (10 <sup>b</sup> )  | 111.9             | 113.1 (10 <sup>a</sup> )  | +1.3                                             | +1.2     | +0.3                                         | +0.2              |
|               |                       |                                      | 114.0 (10 <sup>c</sup> )  |                   | 113.9 (10 <sup>b</sup> )  | +2.4                                             | +2.0     |                                              | -0.1              |
|               |                       |                                      | 116.1 (10 <sup>d</sup> )  | -                 | -                         | +4.5                                             | -        | -                                            | -                 |
| <b>ring C</b> | <b>11</b>             | 128.5                                | 130.1 (11 <sup>a</sup> )  | 128.7             | 130.3                     | +1.6                                             | +1.6     | +0.2                                         | +0.2              |
|               |                       |                                      | 130.7 (11 <sup>b</sup> )  |                   | -                         | +2.2                                             | -        | -0.4                                         | -0.4              |
|               | <b>12</b>             | 145.8                                | 145.8 (12 <sup>a</sup> )  | 144.4             | 143.3                     | 0.0                                              | -1.1     | -1.4                                         | -2.5              |
|               |                       |                                      | 146.8 (12 <sup>a</sup> )  |                   | -                         | +1.0                                             | -        | -3.5                                         | -3.5              |
|               | <b>12<sup>1</sup></b> | 21.9                                 | 20.0 (12 <sup>1a</sup> )  | 21.1              | 20.0 (12 <sup>1a</sup> )  | -1.9                                             | -1.1     | -0.8                                         | 0.0               |
|               |                       |                                      | 20.5 (12 <sup>1b</sup> )  |                   | -                         | -1.4                                             | -        |                                              | -                 |
|               |                       |                                      | 21.0 (12 <sup>1c</sup> )  |                   | 21.3 (12 <sup>1b</sup> )  | -0.9                                             | +0.2     |                                              | +0.3              |
|               | <b>12<sup>2</sup></b> | 37.8                                 | 37.7 (12 <sup>2a</sup> )  | 38.3              | 37.0 (12 <sup>2a</sup> )  | -0.1                                             | -1.3     | +0.5                                         | -0.7              |
|               |                       |                                      | 38.2 (12 <sup>2b</sup> )  |                   | 37.6 (12 <sup>2b</sup> )  | +0.4                                             | -0.7     |                                              | -0.6              |
|               |                       |                                      | 38.7 (12 <sup>2c</sup> )  |                   | -                         | +0.9                                             | -        |                                              | -                 |
|               | <b>12<sup>3</sup></b> | 179.5                                | 178.6 (12 <sup>3a</sup> ) | 178.1             | 177.9 (12 <sup>3a</sup> ) | -0.9                                             | -0.2     | -1.4                                         | -0.7              |
|               |                       |                                      | 180.4 (12 <sup>3b</sup> ) |                   | 179.4 (12 <sup>3b</sup> ) | +0.9                                             | +1.3     |                                              | -1.0              |
|               | <b>13</b>             | 125.0                                | 129.7 (13 <sup>a</sup> )  | 126.2             | 125.7 (13 <sup>a</sup> )  | +4.7                                             | -0.5     | +1.2                                         | -4.0              |
|               |                       |                                      | 131.4 (13 <sup>b</sup> )  |                   | 126.6 (13 <sup>b</sup> )  | +6.4                                             | +0.4     |                                              | -4.8              |
|               |                       |                                      | 132.0 (13 <sup>c</sup> )  |                   | -                         | +7.0                                             | -        |                                              | -                 |
|               | <b>13<sup>1</sup></b> | 10.9                                 | 10.8 (13 <sup>1a</sup> )  | 11.1              | 9.8                       | -0.1                                             | -1.3     | +0.2                                         | -1.0              |
|               |                       |                                      | 11.4 (13 <sup>1b</sup> )  |                   | -                         | +0.5                                             | -        | -1.6                                         | -1.6              |
|               | <b>14</b>             | 143.1                                | 145.1                     | 144.9             | 144.9                     | +2.0                                             | 0.0      | +1.8                                         | -0.2              |
| <b>C–D</b>    | <b>15</b>             | 94.2 (15 <sup>a</sup> )              | 95.2 (15 <sup>a</sup> )   | 94.3              | 94.1 (15 <sup>a</sup> )   | +1.0                                             | -0.2     | +0.1                                         | -1.1              |
|               |                       | 94.9 (15 <sup>b</sup> )              | 97.2 (15 <sup>b</sup> )   |                   | 95.8 (15 <sup>b</sup> )   | +2.3                                             | +1.5     | -0.6                                         | -1.4              |
|               |                       | -                                    | 97.6 (15 <sup>c</sup> )   |                   | -                         | -                                                | -        | -                                            | -                 |
| <b>ring D</b> | <b>16</b>             | 144.2                                | 143.6                     | 144.1             | 144.0                     | -0.6                                             | -0.1     | -0.1                                         | +0.4              |
|               | <b>17</b>             | -                                    | 140.5 (17 <sup>a</sup> )  | -                 | -                         | -                                                | -        | -                                            | -                 |
|               |                       | 141.1 (17 <sup>a</sup> )             | 141.4 (17 <sup>b</sup> )  | 142.2             | 142.2 (17 <sup>a</sup> )  | +0.3                                             | 0.0      | +1.1                                         | +0.8              |
|               |                       | 142.3 (17 <sup>b</sup> )             | 142.1 (17 <sup>c</sup> )  |                   | 142.8 (17 <sup>b</sup> )  | -0.2                                             | +0.6     | -0.1                                         | +0.7              |
|               | <b>17<sup>1</sup></b> | 9.6                                  | 8.7 (17 <sup>1a</sup> )   | 10.0              | 8.9 (17 <sup>1a</sup> )   | -0.9                                             | -1.1     | +0.4                                         | +0.2              |
|               |                       |                                      | 9.3 (17 <sup>1b</sup> )   |                   | 9.8 (17 <sup>1b</sup> )   | -0.3                                             | -0.2     | +0.5                                         | +0.5              |
|               | <b>18</b>             | 133.3                                | 131.9 (18 <sup>a</sup> )  | 133.9             | 132.7 (18 <sup>a</sup> )  | -1.4                                             | -1.2     | +0.6                                         | +0.8              |
|               |                       |                                      | 133.6 (18 <sup>b</sup> )  |                   | 133.6 (18 <sup>b</sup> )  | +0.3                                             | -0.3     | 0.0                                          | 0.0               |
|               | <b>18<sup>1</sup></b> | 15.3                                 | 16.4 (18 <sup>1a</sup> )  | 15.9              | 15.5                      | +1.1                                             | -0.4     | +0.6                                         | -0.9              |
|               |                       |                                      | 17.4 (18 <sup>1b</sup> )  |                   | -                         | +2.1                                             | -        | -1.9                                         | -1.9              |
|               | <b>18<sup>2</sup></b> | 12.1                                 | 12.9 (18 <sup>2a</sup> )  | 12.7              | 12.6                      | +0.8                                             | -0.1     | +0.6                                         | -0.3              |
|               |                       |                                      | 14.5 (18 <sup>2b</sup> )  |                   | -                         | +2.4                                             | -        | -1.9                                         | -1.9              |
|               | <b>19</b>             | 172.2                                | 173.8 (19 <sup>a</sup> )  | 172.7             | 173.4                     | +1.6                                             | +0.7     | +0.5                                         | -0.4              |
|               |                       |                                      | 174.8 (19 <sup>b</sup> )  |                   | -                         | +2.6                                             | -        | -1.4                                         | -1.4              |

**Table S2.**  $^1\text{H}$  chemical shifts of the carbon-bound protons in PCB chromophore as incorporated in All2699GAF1 and All2699(GAF1-PHY) in their Pr dark states as lyophilized powder. Published  $^1\text{H}$  data of frozen All2699GAF1 and All2699(GAF1-PHY) solutions are listed for reference. The  $^1\text{H}$  chemical shift values obtained from All2699GAF1 and All2699(GAF1-PHY) as lyophilized powder are compared with those from the frozen solution samples. The  $^1\text{H}$  chemical shift differences of chromophore carbon-bound protons in the two photoreceptors between the lyophilized and frozen solution states are listed and illustrated in Figure 3. The chromophore numbering is according to Figure 1d.

| PCB carbon-bound protons |                 | $^1\text{H}$ chemical shift (ppm) |                   |                   |                   | $^1\text{H}$ chemical shift difference (ppm)                 |          |                                                          |                   |
|--------------------------|-----------------|-----------------------------------|-------------------|-------------------|-------------------|--------------------------------------------------------------|----------|----------------------------------------------------------|-------------------|
|                          |                 | All2699GAF1                       |                   | All2699(GAF1-PHY) |                   | $\Delta_{\text{Lyophilized state} - \text{Frozen solution}}$ |          | $\Delta_{\text{All2699(GAF1-PHY)} - \text{All2699GAF1}}$ |                   |
|                          |                 | Frozen solution                   | Lyophilized state | Frozen solution   | Lyophilized state | GAF1                                                         | GAF1-PHY | Frozen solution                                          | Lyophilized state |
| ring A                   | 2               | 1.9 ( $2^a$ )                     |                   | -                 | -                 | +0.3                                                         | -        | -                                                        | -                 |
|                          |                 | 2.0 ( $2^b$ )                     | 2.2               | 1.8 ( $2^a$ )     | 1.8 ( $2^a$ )     | +0.2                                                         | 0.0      | -0.2                                                     | -0.4              |
|                          |                 | 2.5 ( $2^c$ )                     |                   | 2.4 ( $2^b$ )     | 2.3 ( $2^b$ )     | -0.3                                                         | -0.1     | -0.1                                                     | +0.1              |
|                          | 2 <sup>1</sup>  | 1.7                               | 1.9               | 2.1               | 2.1               | +0.2                                                         | 0.0      | +0.4                                                     | +0.2              |
|                          | 3               | -                                 | 2.1 ( $3^a$ )     | 1.9 ( $3^a$ )     | 2.2 ( $3^a$ )     | -                                                            | +0.3     | -0.6                                                     | +0.1              |
|                          |                 | 2.5 ( $3^a$ )                     | 2.2 ( $3^b$ )     | 2.7 ( $3^b$ )     | 3.0 ( $3^b$ )     | -0.3                                                         | +0.3     | -0.4                                                     | +0.8              |
|                          |                 | 3.1 ( $3^b$ )                     | 3.9 ( $3^c$ )     | -                 | -                 | +0.8                                                         | -        | -                                                        | -                 |
|                          | 3 <sup>1</sup>  | 2.9 ( $3^{1a}$ )                  | 3.7 ( $3^{1a}$ )  |                   | 2.8 ( $3^{1a}$ )  | +0.8                                                         | -0.5     | +0.4                                                     | -0.9              |
|                          |                 | 4.9 ( $3^{1b}$ )                  | 4.8 ( $3^{1b}$ )  | 3.3               | 3.6 ( $3^{1b}$ )  | -0.1                                                         | +0.3     | -1.6                                                     | -1.2              |
|                          | 3 <sup>2</sup>  | 1.6 ( $3^{2a}$ )                  |                   |                   |                   | +0.3                                                         |          | +0.3                                                     |                   |
|                          |                 | 1.9 ( $3^{2b}$ )                  | 1.9               | 1.9               | 2.0               | 0.0                                                          | +0.1     | 0.0                                                      | +0.1              |
| A-B                      | 5               | 6.8 ( $5^a$ )                     | 5.7 ( $5^a$ )     | 5.4 ( $5^a$ )     | 5.9 ( $5^a$ )     | -0.9                                                         | +0.5     | -1.4                                                     | +0.2              |
|                          |                 | 7.5 ( $5^b$ )                     | 6.0 ( $5^b$ )     | 6.2 ( $5^b$ )     | 6.4 ( $5^b$ )     | -1.5                                                         | +0.2     | -1.3                                                     | +0.4              |
| ring B                   | 7 <sup>1</sup>  | 2.3                               | 2.2               | 2.4               | 2.5               | -0.1                                                         | +0.1     | +0.1                                                     | +0.3              |
|                          | 8 <sup>1</sup>  | 1.6 ( $8^{1a}$ )                  | 1.7 ( $8^{1a}$ )  | 1.7 ( $8^{1a}$ )  |                   | +0.1                                                         | +0.5     | +0.1                                                     | +0.5              |
|                          |                 | -                                 | 2.2 ( $8^{1a}$ )  | 2.3 ( $8^{1b}$ )  | 2.2               | -                                                            | -0.1     | -                                                        | 0.0               |
|                          |                 | 3.0 ( $8^{1b}$ )                  | 2.7 ( $8^{1c}$ )  | -                 | -                 | -0.3                                                         | -        | -0.3                                                     | -0.5              |
|                          | 8 <sup>2</sup>  |                                   |                   | 2.8 ( $8^{2a}$ )  | 3.0 ( $8^{2a}$ )  |                                                              | +0.2     | -0.6                                                     | -0.6              |
|                          |                 | 3.4                               | 3.6               | 3.5 ( $8^{2b}$ )  | 3.6 ( $8^{2b}$ )  | +0.2                                                         | +0.1     | +0.1                                                     | 0.0               |
| B-C                      | 10              | 7.9                               | 6.4               | 7.6               | 7.2               | -1.5                                                         | -0.4     | -0.3                                                     | +0.8              |
| ring C                   | 12 <sup>1</sup> |                                   | 2.0 ( $12^{1a}$ ) | 2.2 ( $12^{1a}$ ) | 2.1 ( $12^{1a}$ ) | +0.4                                                         | -0.1     | +0.6                                                     | +0.1              |
|                          |                 | 1.6                               | 2.4 ( $12^{1b}$ ) | 3.5 ( $12^{1b}$ ) | 3.6 ( $12^{1b}$ ) | +0.8                                                         | +0.1     | +1.9                                                     | +1.2              |
|                          | 12 <sup>2</sup> | 3.4                               | 3.4               | 3.5               | 3.3               | 0.0                                                          | -0.2     | +0.1                                                     | -0.1              |
|                          | 13 <sup>1</sup> | 2.0                               | 2.0               | 2.1               | 2.1               | 0.0                                                          | 0.0      | +0.1                                                     | +0.1              |
| C-D                      | 15              | 6.2 ( $15^a$ )                    |                   |                   |                   | -1.1                                                         |          | -0.5                                                     |                   |
|                          |                 | 6.9 ( $15^b$ )                    | 5.1               | 5.7               | 5.3               | -1.8                                                         | -0.4     | -1.2                                                     | +0.2              |
| ring D                   | 17 <sup>1</sup> | 2.1                               | 2.4               | 2.3               | 2.5               | +0.3                                                         | +0.2     | +0.2                                                     | +0.1              |
|                          | 18 <sup>1</sup> | 1.8 ( $18^{1a}$ )                 |                   | 1.4 ( $18^{1a}$ ) |                   | +0.2                                                         | +0.7     | -0.4                                                     |                   |
|                          |                 | 2.3 ( $18^{1b}$ )                 | 2.0               | 2.1 ( $18^{1b}$ ) | 2.1               | -0.3                                                         | 0.0      | -0.2                                                     | +0.1              |
|                          | 18 <sup>2</sup> | 1.4                               | 1.9               | 1.9               | 1.9               | +0.5                                                         | 0.0      | +0.5                                                     | 0.0               |



**Table S3.**  $^1\text{H}$  chemical shifts of the protons bound to tetrapyrrole nitrogens in PCB chromophore as incorporated in All2699GAF1 and All2699(GAF1-PHY) in their Pr dark states as lyophilized powder. Published  $^1\text{H}$  data of frozen All2699GAF1 and All2699(GAF1-PHY) solutions are listed for reference. The  $^1\text{H}$  chemical shift values obtained from All2699GAF1 and All2699(GAF1-PHY) as lyophilized powder are compared with those from the frozen solution samples. The  $^1\text{H}$  chemical shift differences of protons bound to tetrapyrrole nitrogens in the two photoreceptors between the lyophilized and frozen solution states are listed and illustrated in Figure 4e.

| NH21–N24H     |      | $^1\text{H}$ chemical shift (ppm) |                           |                   |                   | $^1\text{H}$ chemical shift difference (ppm)                 |          |                                                          |                   |
|---------------|------|-----------------------------------|---------------------------|-------------------|-------------------|--------------------------------------------------------------|----------|----------------------------------------------------------|-------------------|
|               |      | All2699GAF1                       |                           | All2699(GAF1-PHY) |                   | $\Delta_{\text{Lyophilized state} - \text{Frozen solution}}$ |          | $\Delta_{\text{All2699(GAF1-PHY)} - \text{All2699GAF1}}$ |                   |
|               |      | Frozen solution                   | Lyophilized state         | Frozen solution   | Lyophilized state | GAF1                                                         | GAF1-PHY | Frozen solution                                          | Lyophilized state |
| <i>ring A</i> | N21H | 12.3 (N21H <sup>a</sup> )         | 12.2 (N21H <sup>a</sup> ) | 12.0              | 11.8              | -0.1                                                         | -0.1     | -0.3                                                     | -0.2              |
|               |      | 12.8 (N21H <sup>b</sup> )         | 12.5 (N21H <sup>b</sup> ) |                   |                   | -0.3                                                         |          | -0.8                                                     |                   |
| <i>ring B</i> | N22H | 9.9                               | 9.1 (N22H <sup>a</sup> )  | 10.2              | 10.3              | -0.8                                                         | +0.1     | +0.3                                                     | +1.2              |
|               |      |                                   | 9.9 (N22H <sup>b</sup> )  |                   |                   | 0.0                                                          |          | +0.4                                                     | +0.4              |
| <i>ring C</i> | N23H | 10.7                              | 10.6                      | 11.6              | 11.0              | -0.1                                                         | -0.6     | +0.9                                                     | -0.6              |
| <i>ring D</i> | N24H | 11.6                              | 11.6                      | 9.6               | 9.4               | 0.0                                                          | -0.2     | -2.0                                                     | -0.2              |

**Table S4.** <sup>15</sup>N chemical shifts of the PCB chromophore incorporated in All2699GAF1 and All2699(GAF1–PHY) in their Pr dark states as lyophilized powder. Published <sup>15</sup>N data of frozen All2699GAF1 and All2699(GAF1–PHY) solutions are listed for reference. The <sup>15</sup>N chemical shift values obtained from All2699GAF1 and All2699(GAF1–PHY) as lyophilized powder are compared with those from the frozen solution samples. The <sup>15</sup>N chemical shift differences of PCB tetrapyrrole nitrogens in the two photoreceptors between the lyophilized and frozen solution states are listed and illustrated in [Figure 4f](#).

|                   |     | <sup>15</sup> N chemical shift (ppm) |                           |                   |                           | <sup>15</sup> N chemical shift difference (ppm)              |          |                                                          |                   |
|-------------------|-----|--------------------------------------|---------------------------|-------------------|---------------------------|--------------------------------------------------------------|----------|----------------------------------------------------------|-------------------|
| Pyrrole nitrogens |     | All2699GAF1                          |                           | All2699(GAF1–PHY) |                           | $\Delta_{\text{Lyophilized state} - \text{Frozen solution}}$ |          | $\Delta_{\text{All2699(GAF1–PHY)} - \text{All2699GAF1}}$ |                   |
|                   |     | Frozen solution                      | Lyophilized state         | Frozen solution   | Lyophilized state         | GAF1                                                         | GAF1–PHY | Frozen solution                                          | Lyophilized state |
|                   |     |                                      |                           |                   |                           |                                                              |          |                                                          |                   |
| ring A            | N21 | 161.2                                | 160.0 (N21 <sup>a</sup> ) | 160.2             | 158.8 (N21 <sup>a</sup> ) | –1.2                                                         | –1.4     | –1.0                                                     | –1.2              |
|                   |     |                                      | 163.2 (N21 <sup>b</sup> ) |                   | 159.9 (N21 <sup>b</sup> ) | +2.0                                                         | –0.3     |                                                          | –3.3              |
|                   |     |                                      |                           |                   |                           |                                                              |          |                                                          |                   |
| ring B            | N22 | 144.7                                | 145.2 (N22 <sup>a</sup> ) | 144.9             | 144.7                     | +0.5                                                         | –0.2     | +0.2                                                     | –0.5              |
|                   |     |                                      | 146.4 (N22 <sup>b</sup> ) |                   |                           | +1.7                                                         |          |                                                          | –1.7              |
|                   |     |                                      |                           |                   |                           |                                                              |          |                                                          |                   |
| ring C            | N23 | 155.8                                | 154.6                     | 156.7             | 156.9                     | –1.2                                                         | +0.2     | +0.9                                                     | +2.3              |
| ring D            | N24 | 130.9                                | 130.4                     | 131.9             | 131.5                     | –0.5                                                         | –0.4     | +1.0                                                     | +1.1              |
